# Supplementary material for: Synthesis of vinyl germylenes
Source: Royal Society of Chemistry journal article supplement (doi:10.1039/c4cc07675c), 2014-11-06
Supplement: c4cc07675c1.pdf [file c4cc07675c1.pdf]

## Supporting Material

for

# Synthesis of Vinyl Germylenes

Małgorzata Walewska, Judith Baumgartner,\* Christoph Marschner\*

|                                  |      |
|----------------------------------|------|
| 1. Experimental details          | S-2  |
| 2. Crystallographic tables       | S-6  |
| 3. Figures of crystal structures | S-8  |
| 3. References                    | S-13 |

## Experimental details:

*General Remarks:* All reactions involving air-sensitive compounds were carried out under an atmosphere of dry nitrogen using either Schlenk techniques or a glove box. Solvents were dried using a column solvent purification system.<sup>1</sup>

The following compounds were prepared using published procedures:  $(\text{Me}_3\text{Si})_3\text{SiK}$ ,<sup>2,3</sup>  $\text{GeCl}_2$ -dioxane,<sup>4</sup> and 1,3-diisopropyl-4,5-dimethylimidazol-2-ylidene (MeIiPr).<sup>5</sup> All other chemicals were bought from different suppliers and were used without further purification.

$^1\text{H}$  (299.9 MHz),  $^{13}\text{C}$  (75.4 MHz),  $^{29}\text{Si}$  (59.3 MHz), and  $^{31}\text{P}$  (121.4 MHz) NMR spectra were recorded on a Varian INOVA 300 spectrometer. All samples were either dissolved in deuterated benzene, or in case of  $^{29}\text{Si}$  NMR reaction control experiments measured with a  $\text{D}_2\text{O}$  capillary in order to provide an external lock frequency signal. The INEPT pulse sequence was used to enhance  $^{29}\text{Si}$  NMR signals.<sup>6,7</sup>

*X-Ray structure determination:* For X-ray structure analyses the crystals were mounted onto the tip of glass fibers, and data collection was performed with a BRUKER-AXS SMART APEX CCD diffractometer using graphite-monochromated  $\text{Mo K}\alpha$  radiation (0.71073 Å). The data were reduced to  $F^2_o$  and corrected for absorption effects with SAINT<sup>8</sup> and SADABS<sup>9,10</sup>, respectively. The structures were solved by direct methods and refined by full-matrix least-squares method (SHELXL97).<sup>11</sup>

If not noted otherwise all non-hydrogen atoms were refined with anisotropic displacement parameters. All hydrogen atoms were located in calculated positions to correspond to standard bond lengths and angles. All diagrams were drawn with 30% probability thermal ellipsoids and all hydrogen atoms were omitted for clarity. Crystallographic data (excluding structure factors) for the structures of compounds **1a**, **2**, **3**, **4**, **5**, and **6** reported in this paper have been deposited with the Cambridge Crystallographic Data Centre as supplementary publication no. CCDC 976691 (**1a**), 969564 (**2**), 969563 (**3**), 969566 (**4**), 1008594 (**5**), and 969567 (**6**). Copies of the data can be obtained free of charge at: <http://www.ccdc.cam.ac.uk/products/csd/request/>.

### **Bis[tris(trimethylsilyl)silyl]germylene·[:C{N(*i*Pr)C(Me)}<sub>2</sub>] (1a)**

A solution of tris(trimethylsilyl)silyl potassium (1.56 mmol) in THF (40 mL) was slowly added dropwise to a vigorously stirred solution of GeCl<sub>2</sub>·dioxane (180 mg; 0.78 mmol) and 1,3-diisopropyl-4,5-dimethylimidazol-2-ylidene (140 mg, 0.78 mmol) in THF (20 mL) at -30 °C. Stirring of the reaction mixture was continued for 14 h at rt. The solvent was removed under reduced pressure and the product was extracted with pentane (3 x 20 mL). The solvent was removed to yield **1a** as an orange solid (469 mg; 80 %). Crystallization from toluene at -35 °C gave orange crystals suitable for X-ray study. Mp = 108-110 °C. <sup>1</sup>H NMR (δ in ppm): 6.56 (br, 1H, CH(CH<sub>3</sub>)), 5.73 (br, 1H, CH(CH<sub>3</sub>)), 1.55 (s, 6H, NHC-CH<sub>3</sub>), 1.30 (br, 12H, CH(CH<sub>3</sub>)), 0.41 (s, 54H, SiMe<sub>3</sub>). <sup>1</sup>H NMR (δ in ppm, toluene-d<sub>8</sub>, -20 °C): 6.55 (m, 1H, CH(CH<sub>3</sub>)), 5.58 (m, 1H, CH(CH<sub>3</sub>)), 1.55 (s, 3H, NHC-CH<sub>3</sub>), 1.49 (s, 3H, NHC-CH<sub>3</sub>), 1.24 (d, 6H, CH(CH<sub>3</sub>), <sup>3</sup>J=7.0 Hz), 1.05 (d, 6H, CH(CH<sub>3</sub>), <sup>3</sup>J=6.9 Hz), 0.37 (s, 54H, SiMe<sub>3</sub>). <sup>13</sup>C NMR (δ in ppm): 173.2 (N-C-N), 126.5 (MeC=CMe), 54.8 (CH(CH<sub>3</sub>)), 52.3 (CH(CH<sub>3</sub>)), 22.7 (CH(CH<sub>3</sub>)), 21.7 (CH(CH<sub>3</sub>)), 10.0 (NHC-CH<sub>3</sub>), 4.7 (SiMe<sub>3</sub>). <sup>29</sup>Si NMR (δ in ppm): -8.8 (SiMe<sub>3</sub>), -122.9 (Si(SiMe<sub>3</sub>)<sub>3</sub>). Anal. calcd for C<sub>29</sub>H<sub>74</sub>GeN<sub>2</sub>Si<sub>8</sub> (748.23): C 46.55, H 9.97, N 3.74. Found: C 46.84, H 9.65, N 3.89.

### **Bis[tris(trimethylsilyl)silyl]germylene·PMe<sub>3</sub> (1b)**

A solution of tris(trimethylsilyl)silyl potassium (0.62 mmol) in THF (2 mL) was slowly added dropwise to a vigorously stirred solution of GeCl<sub>2</sub>·dioxane (72 mg, 0.31 mmol) and trimethylphosphine (23 mg, 0.31 mmol) in THF (2 mL) at -30°C. Full conversion was detected by <sup>29</sup>Si NMR after 15 minutes. Compound **1b** was used without further purification. An approximate yield of 60 % was estimated by comparing the SiMe<sub>3</sub> <sup>1</sup>H signal of **1b** to the SiMe<sub>3</sub> <sup>1</sup>H signal of Me<sub>3</sub>SiOtBu which is present in the solution from the formation of tris(trimethylsilyl)silyl potassium. <sup>1</sup>H NMR (δ in ppm, D<sub>2</sub>O capillary): 1.37 (s, 9H, PMe<sub>3</sub>), 0.43 (s, 54H, SiMe<sub>3</sub>). <sup>29</sup>Si NMR (δ in ppm, D<sub>2</sub>O capillary): -8.7 (d, SiMe<sub>3</sub>, <sup>3</sup>J<sub>Si-P</sub> = 11 Hz), -119.9 (Si(SiMe<sub>3</sub>)<sub>3</sub>, <sup>2</sup>J<sub>Si-P</sub> = 15 Hz). <sup>31</sup>P NMR (δ in ppm, D<sub>2</sub>O capillary): -20.1 (PMe<sub>3</sub>).

### **1,1-Bis[tris(trimethylsilyl)silyl]-2,3-diphenyl-1-germacyclopropene (2)**

Diphenylacetylene (138 mg, 0.76 mmol) was added to the solution of **1b** (0.78 mmol) in THF (10 mL) at rt and stirred for 12 h. The solvent was removed under reduced pressure and product was extracted with pentane (3 x 5 mL). The solvent was removed to yield **2** as an orange solid (248 mg, 44%). Crystallization from pentane gives orange crystals suitable for X-ray measurement. Mp = 104-106 °C. <sup>1</sup>H NMR (δ in ppm): 7.92 (d, 4H, *o*-H), 7.23 (t, 4H, *m*-H), 7.02 (t, 2H, *p*-H), 0.26 (s, 54H, SiMe<sub>3</sub>). <sup>13</sup>C

NMR ( $\delta$  in ppm): 145.4, 134.4, 131.6, 130.0, 128.2, 2.9 (*SiMe*<sub>3</sub>). <sup>29</sup>Si NMR ( $\delta$  in ppm): -9.2 (*SiMe*<sub>3</sub>), -92.6 (*Si*(*SiMe*<sub>3</sub>)<sub>3</sub>). Anal. calcd for C<sub>32</sub>H<sub>64</sub>GeSi<sub>8</sub> (746.17): C 51.51, H 8.65. Found: C 50.54, H 8.38.

### **[(Z)-1-Phenyl-2-(tris(trimethylsilyl)silyl)vinyl]tris(trimethylsilyl)silylgermylene·PMe<sub>3</sub> (3)**

Phenylacetylene (79 mg, 0.78 mmol) was added to a stirred solution of **1b** (0.78 mmol) in THF (10 mL) at rt. After 1 h the solvent was evaporated under reduced pressure and the orange residue was extracted with pentane (3 x 5 ml). After concentration to 1.5 mL and storage at -35 °C orange crystals of **3** (108 mg, 19 %) were obtained. Mp = 119-130 °C. <sup>1</sup>H NMR ( $\delta$  in ppm): 7.52 (d, 2H, *o*-H), 7.15 (t, 2H, *m*-H), 6.94 (t, 1H, *p*-H), 6.86 (s, 1H, *CH*), 0.87 (d, 9H, *PMe*<sub>3</sub>, <sup>2</sup>*J*<sub>H-P</sub> = 9.6 Hz), 0.40 (s, 27H, *CSi*(*SiMe*<sub>3</sub>)<sub>3</sub>), 0.39 (s, 27H, *GeSi*(*SiMe*<sub>3</sub>)<sub>3</sub>). <sup>13</sup>C NMR ( $\delta$  in ppm): 173.0 (d, *C=CH*, <sup>2</sup>*J*<sub>P-C</sub> = 7 Hz), 153.2 (d, *Ph-Ge*, <sup>3</sup>*J*<sub>P-C</sub> = 3 Hz), 142.0 (d, *C=CH*, <sup>3</sup>*J*<sub>P-C</sub> = 16 Hz), 127.7 (2 signals), 125.5, 2.2 (*SiMe*<sub>3</sub>), 15.1 (d, *PMe*<sub>3</sub>, <sup>1</sup>*J*<sub>P-C</sub> = 20 Hz), 3.9 (*SiMe*<sub>3</sub>). <sup>29</sup>Si NMR ( $\delta$  in ppm): -8.9 (d, *GeSi*(*SiMe*<sub>3</sub>)<sub>3</sub>, <sup>3</sup>*J*<sub>P-Si</sub> = 12 Hz), -12.9 (d, *CSi*(*SiMe*<sub>3</sub>)<sub>3</sub>, <sup>5</sup>*J*<sub>P-Si</sub> = 2 Hz), -83.4 (*CSi*(*SiMe*<sub>3</sub>)<sub>3</sub>), -126.9 (d, *GeSi*(*SiMe*<sub>3</sub>)<sub>3</sub>, <sup>4</sup>*J*<sub>P-Si</sub> = 15 Hz). <sup>31</sup>P NMR ( $\delta$  in ppm): -24.6. Anal. calcd for C<sub>29</sub>H<sub>69</sub>GePSi<sub>8</sub> (746.15): C 46.68, H 9.32. Found: C 46.25, H 9.14.

### **Bis[(Z)-1-phenyl-2-(tris(trimethylsilyl)silyl)vinyl]germylene·PMe<sub>3</sub> (4)**

Phenylacetylene (60 mg, 0.59 mmol) was added to the stirred solution of **1b** (0.29 mmol) in THF (10 mL) at rt. After 1 h the solvent was removed under reduced pressure and the product was extracted with pentane (3 x 5 mL). The solvent was removed to yield **4** as an orange solid (232 mg, 93%). Slow evaporation of pentane gave orange crystal suitable for X-ray study. <sup>1</sup>H NMR ( $\delta$  in ppm): 7.02 (m, 4H, *m*-H), 6.83 (m, 6H, *o*-H, *p*-H), 6.66 (s, 2H, *CH*), 0.87 (d, 9H, *PMe*<sub>3</sub>, <sup>2</sup>*J*<sub>H-P</sub> = 8.7 Hz), 0.40 (s, 54H, *SiMe*<sub>3</sub>). <sup>13</sup>C NMR ( $\delta$  in ppm): 177.6 (*C=C-Ph*), 156.1 (*Ph-Ge*), 138.7 (*CH*), 126.2 (1 signal overlapping with *C*<sub>6</sub>*D*<sub>6</sub>), 124.7, 15.1 (d, *PMe*<sub>3</sub>, <sup>1</sup>*J*<sub>P-C</sub> = 21 Hz), 2.1 (*SiMe*<sub>3</sub>). <sup>29</sup>Si NMR ( $\delta$  in ppm): -12.9 (*SiMe*<sub>3</sub>), -86.2 (*Si*(*SiMe*<sub>3</sub>)<sub>3</sub>). <sup>31</sup>P NMR ( $\delta$  in ppm): -24.6.

### **2-[Tris(trimethylsilyl)silyl]-3-phenyl-1,1,2-tris(trimethylsilyl)-1,2-dihydro-1,2-silagermete (5)**

*B*(*C*<sub>6</sub>*F*<sub>5</sub>)<sub>3</sub> (66 mg, 0.13 mmol) in pentane (3 mL) was added dropwise to the stirred solution of **3** (100 mg, 0.13 mmol) in pentane (2 mL). During reaction white precipitate was formed. The suspension was filtrated through the glass wool and celite. The solvent was evaporated to give **5** as a pale yellow solid (72 mg, 83%). Mp = 108-110 °C. <sup>1</sup>H NMR ( $\delta$  in ppm):, 7.44 (s, 1H, *C-H*), 7.44 (d, 2H, *o*-H), 7.17 (t, 2H, *m*-H), 7.03 (t, 1H, *p*-H), 0.42 (s, 9H, *SiMe*<sub>3</sub>), 0.41 (s, 9H, *SiMe*<sub>3</sub>), 0.38 (s, 9H, *SiMe*<sub>3</sub>), 0.35 (s, 27H,

$\text{SiMe}_3$ ).  $^{13}\text{C}$  NMR ( $\delta$  in ppm): 169.0 ( $C_{\text{ipso}}$ ), 140.8 ( $C\text{-Ph}$ ), 140.0 ( $C\text{-H}$ ), one signal missing, 127.8, 126.5, 3.5 ( $\text{SiMe}_3$ ), 2.5 ( $\text{SiMe}_3$ ), 2.1 ( $\text{SiMe}_3$ ).  $^{29}\text{Si}$  NMR ( $\delta$  in ppm): -3.7 ( $\text{SiMe}_3$ ), -8.4 ( $\text{SiMe}_3$ ), -9.0 ( $\text{SiMe}_3$ ), -14.6 ( $\text{SiMe}_3$ ), -50.9 ( $C\text{-Si-Ge}$ ), -116.6 ( $\text{GeSi}(\text{SiMe}_3)_3$ ). Anal. calcd for  $\text{C}_{26}\text{H}_{60}\text{GeSi}_8$  (670.08): C 46.60, H 9.03. Found: C 44.38, H 5.39.

**(Z)-2-(2-(tris(trimethylsilyl)silyl)-1-phenylvinyl)-3-phenyl-1,1,2-tris(trimethylsilyl)-1,2-dihydro-1,2-silagermete (6)**

**Method A:** A solution of  $\text{B}(\text{C}_6\text{F}_5)_3$  (45 mg, 0.088 mmol) in pentane (3 mL) was added dropwise to a stirred solution of **4** (75 mg, 0.088 mmol) in pentane (2 mL). During the reaction a white precipitate was formed. The suspension was filtrated through plugs of glass wool and celite. After evaporation of the solvent **6** (42 mg, 62%) was obtained as a yellowish solid. **Method B:** Storage of **4** in pentane for 1 week at  $-35\text{ }^\circ\text{C}$  led to formation of **6**. Mp =  $131\text{-}132\text{ }^\circ\text{C}$ .  $^1\text{H}$  NMR ( $\delta$  in ppm): 7.46 (s, 1H,  $C\text{-H}$ ), 7.41 (m, 1H,  $p\text{-H}$ ), 7.27 (d, 2H,  $o\text{-H}$ ), 6.85 (m, 4H), 6.79 (m, 2H), 6.67 (m, 2H), 0.49 (s, 9H,  $\text{SiMe}_3$ ), 0.40 (s, 9H,  $\text{SiMe}_3$ ), 0.33 (s, 9H,  $\text{SiMe}_3$ ), 0.30 (s, 27H,  $\text{SiMe}_3$ ).  $^{13}\text{C}$  NMR ( $\delta$  in ppm): 173.1, 163.4, 153.2, 141.1, 140.8, 138.9, 138.2, 128.5, 127.5, 126.9, 126.2, 126.1, 29.8 ( $\text{SiMe}_3$ ), 2.1 ( $\text{SiMe}_3$ ), 1.7 ( $\text{SiMe}_3$ ), 1.1 ( $\text{SiMe}_3$ ).  $^{29}\text{Si}$  NMR ( $\delta$  in ppm): -4.6 ( $\text{SiMe}_3$ ), -10.0 ( $\text{SiMe}_3$ ), -12.5 ( $\text{SiMe}_3$ ), -13.1 ( $\text{CSi}(\text{SiMe}_3)_3$ ), -45.0 ( $\text{Si-Ge}$ ), -86.5 ( $\text{CSi}(\text{SiMe}_3)_3$ ). Anal. calcd for  $\text{C}_{34}\text{H}_{66}\text{GeSi}_8$  (772.21): C 52.88, H 8.62. Found: C 52.99, H 8.31.

**Table S-1.** Crystallographic data for compounds **1a**, **2**, and **3**.

|                                                            | <b>1a</b>                                                                        | <b>2</b>                                          | <b>3</b>                                            |
|------------------------------------------------------------|----------------------------------------------------------------------------------|---------------------------------------------------|-----------------------------------------------------|
| Empirical formula                                          | Ge <sub>2</sub> C <sub>62</sub> H <sub>144</sub> Si <sub>16</sub> N <sub>4</sub> | GeC <sub>32</sub> H <sub>64</sub> Si <sub>8</sub> | GeC <sub>29</sub> H <sub>69</sub> Si <sub>8</sub> P |
| M <sub>w</sub>                                             | 1540.43                                                                          | 746.14                                            | 746.12                                              |
| Temperature [K]                                            | 100(2)                                                                           | 100(2)                                            | 100(2)                                              |
| Size [mm]                                                  | 0.38×0.22×0.22                                                                   | 0.30×0.18×0.12                                    | 0.36×0.24×0.08                                      |
| Crystal system                                             | orthorhombic                                                                     | monoclinic                                        | orthorhombic                                        |
| Space group                                                | Pca2(1)                                                                          | P2(1)/c                                           | Pbca                                                |
| a [Å]                                                      | 31.634(6)                                                                        | 13.326(3)                                         | 25.174(5)                                           |
| b [Å]                                                      | 16.787(3)                                                                        | 18.718(4)                                         | 14.054(3)                                           |
| c [Å]                                                      | 17.540(4)                                                                        | 18.391(4)                                         | 25.198(5)                                           |
| α [°]                                                      | 90                                                                               | 90                                                | 90                                                  |
| β [°]                                                      | 90                                                                               | 102.16(3)                                         | 90                                                  |
| γ [°]                                                      | 90                                                                               | 90                                                | 90                                                  |
| V [Å <sup>3</sup> ]                                        | 9314(3)                                                                          | 4484(2)                                           | 8915(3)                                             |
| Z                                                          | 4                                                                                | 4                                                 | 8                                                   |
| ρ <sub>calc</sub> [gcm <sup>-3</sup> ]                     | 1.099                                                                            | 1.105                                             | 1.112                                               |
| Absorption coefficient [mm <sup>-1</sup> ]                 | 0.885                                                                            | 0.916                                             | 0.955                                               |
| F(000)                                                     | 3328                                                                             | 1600                                              | 3216                                                |
| θ range                                                    | 1.29<θ<26.37                                                                     | 1.56<θ<26.36                                      | 1.62<θ<26.35                                        |
| Reflections collected/unique                               | 72640/18943                                                                      | 35111/9152                                        | 65992/9077                                          |
| Completeness to θ [%]                                      | 99.9                                                                             | 99.8                                              | 99.8                                                |
| Data/restraints/parameters                                 | 18943/1/802                                                                      | 9152/0/388                                        | 9077/0/373                                          |
| Goodness of fit on F <sup>2</sup>                          | 1.10                                                                             | 1.04                                              | 1.07                                                |
| Final R indices [I>2σ(I)]                                  | R1=0.048,<br>wR2=0.098                                                           | R1=0.034,<br>wR2=0.079                            | R1=0.040,<br>wR2=0.097                              |
| R indices (all data)                                       | R1=0.055,<br>wR2=0.101                                                           | R1=0.043,<br>wR2=0.082                            | R1=0.048,<br>wR2=0.100                              |
| Largest diff. Peak/hole [e <sup>-</sup> / Å <sup>3</sup> ] | 1.02/-0.30                                                                       | 0.67/-0.24                                        | 1.19/-0.96                                          |

**Table S-2.** Crystallographic data for compounds **4**, **5**, and **6**.

|                                                            | <b>4</b>                                            | <b>5</b>                                          | <b>6</b>                                          |
|------------------------------------------------------------|-----------------------------------------------------|---------------------------------------------------|---------------------------------------------------|
| Empirical formula                                          | GeC <sub>37</sub> H <sub>75</sub> Si <sub>8</sub> P | GeC <sub>26</sub> H <sub>60</sub> Si <sub>8</sub> | GeC <sub>34</sub> H <sub>66</sub> Si <sub>8</sub> |
| M <sub>w</sub>                                             | 848.25                                              | 670.05                                            | 772.18                                            |
| Temperature [K]                                            | 100(2)                                              | 150(2)                                            | 100(2)                                            |
| Size [mm]                                                  | 0.45×0.34×0.24                                      | 0.38×0.32×0.12                                    | 0.40×0.22×0.14                                    |
| Crystal system                                             | triclinic                                           | monoclinic                                        | monoclinic                                        |
| Space group                                                | P-1                                                 | P2(1)/n                                           | P2(1)/n                                           |
| a [Å]                                                      | 9.809(2)                                            | 9.642(2)                                          | 13.204(3)                                         |
| b [Å]                                                      | 14.698(3)                                           | 18.886(4)                                         | 19.641(4)                                         |
| c [Å]                                                      | 20.257(4)                                           | 22.043(4)                                         | 18.411(4)                                         |
| α [°]                                                      | 105.37(3)                                           | 90                                                | 90                                                |
| β [°]                                                      | 97.24(3)                                            | 98.58(3)                                          | 109.70(3)                                         |
| γ [°]                                                      | 109.32(3)                                           | 90                                                | 90                                                |
| V [Å <sup>3</sup> ]                                        | 2583(2)                                             | 3969(2)                                           | 4495(2)                                           |
| Z                                                          | 2                                                   | 4                                                 | 4                                                 |
| ρ <sub>calc</sub> [gcm <sup>-3</sup> ]                     | 1.090                                               | 1.121                                             | 1.141                                             |
| Absorption coefficient [mm <sup>-1</sup> ]                 | 0.832                                               | 1.028                                             | 0.916                                             |
| F(000)                                                     | 912                                                 | 1440                                              | 1656                                              |
| θ range                                                    | 1.55<θ<26.37                                        | 1.87<θ<26.34                                      | 1.57<θ<26.38                                      |
| Reflections collected/unique                               | 20672/10411                                         | 31171/8067                                        | 34964/9187                                        |
| Completeness to θ [%]                                      | 98.4                                                | 99.8                                              | 99.8                                              |
| Data/restraints/parameters                                 | 10411/0/445                                         | 8067/0/334                                        | 9187/0/406                                        |
| Goodness of fit on F <sup>2</sup>                          | 1.04                                                | 1.05                                              | 1.10                                              |
| Final R indices [I>2σ(I)]                                  | R1=0.038,<br>wR2=0.091                              | R1=0.029,<br>wR2=0.074                            | R1=0.043,<br>wR2=0.092                            |
| R indices (all data)                                       | R1=0.046,<br>wR2=0.094                              | R1=0.033,<br>wR2=0.076                            | R1=0.052,<br>wR2=0.095                            |
| Largest diff. Peak/hole [e <sup>-</sup> / Å <sup>3</sup> ] | 0.77/-0.30                                          | 0.46/-0.22                                        | 0.80/-0.37                                        |

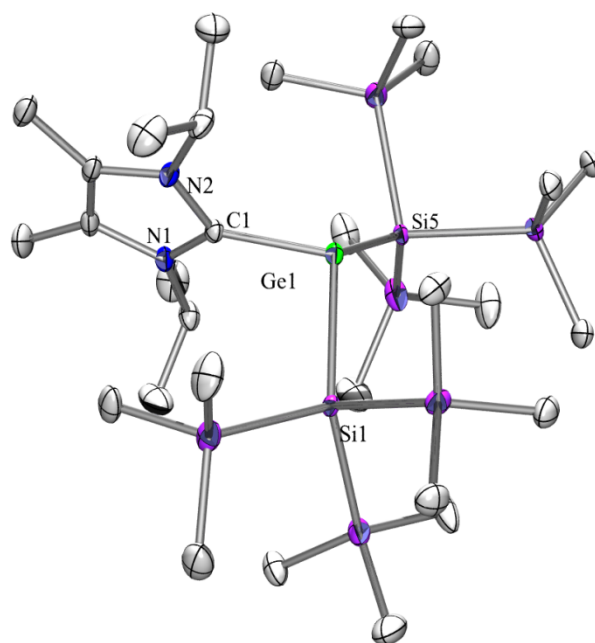

**Figure S-1.** Crystal structure of **1a**. Thermal ellipsoids are represented at the 30% level and hydrogen atoms have been omitted for clarity (bond lengths in Å, angles in deg). C(1)-N(1) 1.357(3), C(1)-N(2) 1.365(3), C(1)-Ge(1) 2.089(2), Ge(1)-Si(5) 2.4834(8), Ge(1)-Si(1) 2.5023(9), Si(1)-Si(4) 2.3647(10), N(1)-C(1)-N(2) 104.7(2), N(1)-C(1)-Ge(1) 135.66(17), N(2)-C(1)-Ge(1) 119.63(17), C(1)-Ge(1)-Si(5) 104.69(7), C(1)-Ge(1)-Si(1) 102.36(7), Si(5)-Ge(1)-Si(1) 117.39(2).



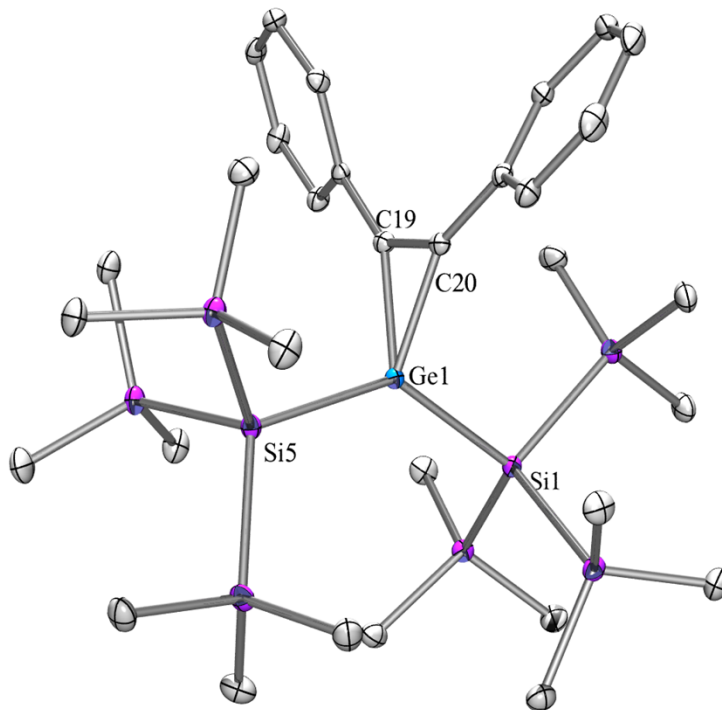

**Figure S-2.** Crystal structure of **2**. Thermal ellipsoids are represented at the 30% level and hydrogen atoms have been omitted for clarity (bond lengths in Å, angles in deg). C(1)-Si(2) 1.870(2), C(19)-C(20) 1.322(3), C(19)-Ge(1) 1.9684(19), C(20)-Ge(1) 1.9695(18), Ge(1)-Si(1) 2.4049(7), Ge(1)-Si(5) 2.4102(7), C(20)-C(19)-Ge(1) 70.43(11), C(19)-C(20)-Ge(1) 70.34(11), C(19)-Ge(1)-C(20) 39.24(8), C(19)-Ge(1)-Si(1) 113.88(6), C(20)-Ge(1)-Si(1) 109.73(6), C(19)-Ge(1)-Si(5) 109.34(6), C(20)-Ge(1)-Si(5) 113.73(6), Si(1)-Ge(1)-Si(5) 133.88(2).

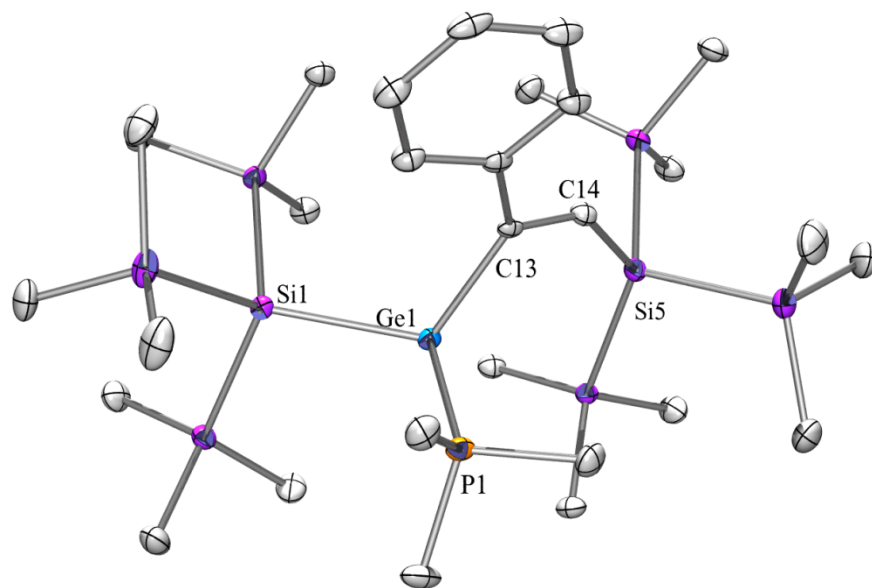

**Figure S-3.** Crystal structure of **3**. Thermal ellipsoids are represented at the 30% level and hydrogen atoms have been omitted for clarity (bond lengths in Å, angles in deg). C(10)-P(1) 1.810(3), C(13)-C(14) 1.347(3), C(13)-Ge(1) 2.031(2), C(14)-Si(5) 1.893(2), Ge(1)-P(1) 2.3900(7), Ge(1)-Si(1) 2.4816(8), Si(1)-Si(4) 2.3566(9), C(14)-C(13)-Ge(1) 112.85(15), C(13)-C(14)-Si(5) 138.84(17), C(13)-Ge(1)-P(1) 93.22(6), C(13)-Ge(1)-Si(1) 114.36(6), P(1)-Ge(1)-Si(1) 103.53(2).

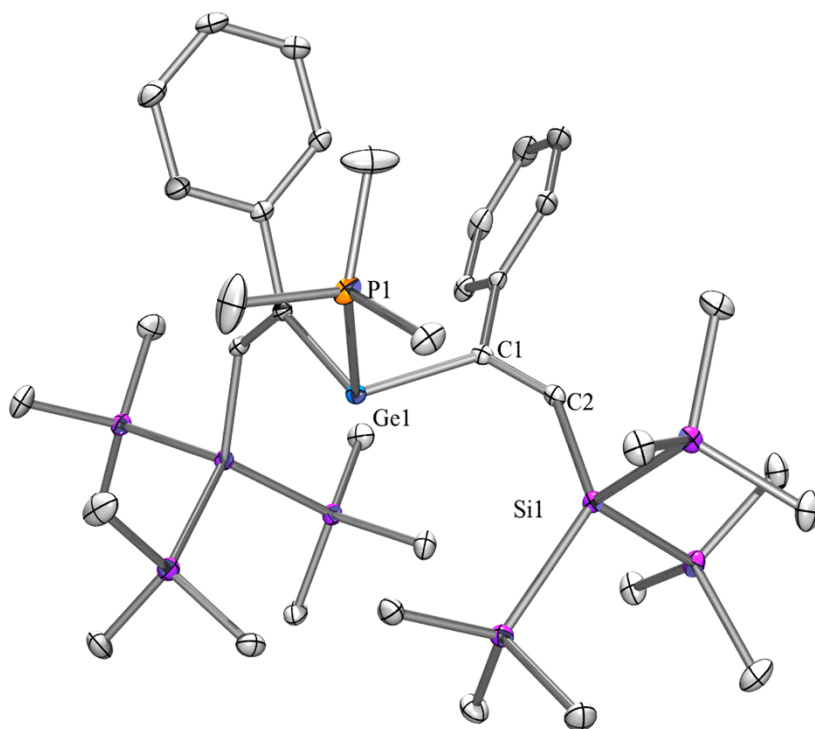

**Figure S-4.** Crystal structure of **4**. Thermal ellipsoids are represented at the 30% level and hydrogen atoms have been omitted for clarity (bond lengths in Å, angles in deg). Ge(1)-C(1) 2.043(2), Ge(1)-P(1) 2.4261(9), P(1)-C(36) 1.799(2), Si(1)-C(2) 1.896(2), Si(1)-Si(2) 2.3557(16), C(1)-C(2) 1.347(3), C(1)-Ge(1)-P(1) 91.84(6), C(2)-Si(1)-Si(2) 127.15(8), C(2)-Si(1)-Si(3) 98.03(7), C(2)-Si(1)-Si(4) 106.81(8), C(1)-C(2)-Si(1) 141.72(17).

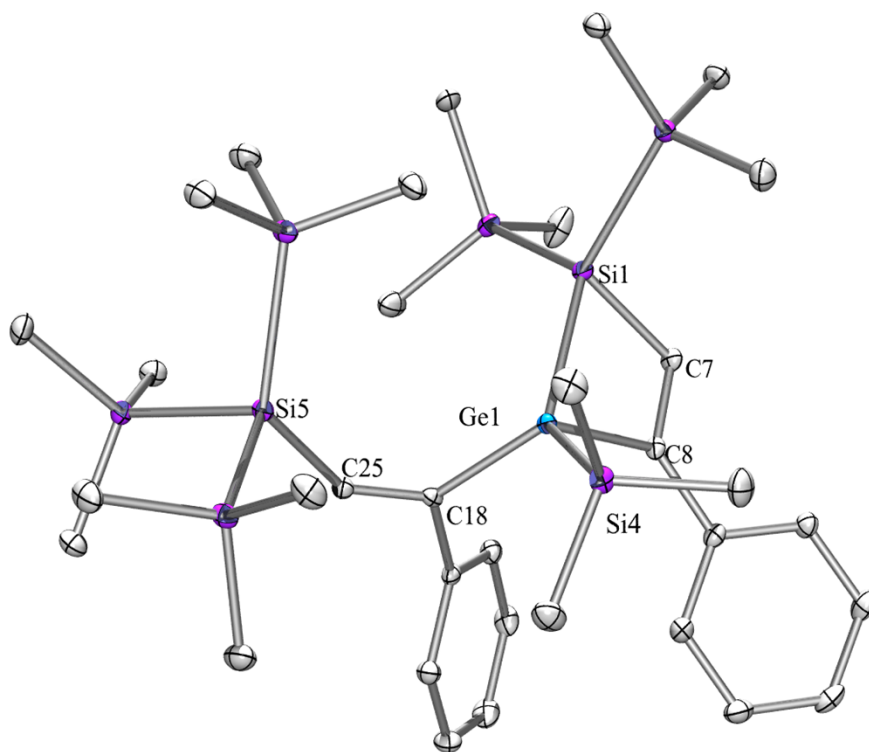

**Figure S-5.** Crystal structure of **6**. Thermal ellipsoids are represented at the 30% level and hydrogen atoms have been omitted for clarity (bond lengths in Å, angles in deg). Ge(1)-C(18) 1.997(2), Ge(1)-C(8) 2.008(2), Ge(1)-Si(4) 2.3959(8), Ge(1)-Si(1) 2.4132(8), Si(1)-C(7) 1.887(2), Si(4)-C(15) 1.869(3), Si(5)-C(25) 1.899(2), C(7)-C(8) 1.349(3), C(18)-C(25) 1.347(3), C(18)-Ge(1)-C(8) 113.89(9), C(18)-Ge(1)-Si(4) 110.71(7), C(8)-Ge(1)-Si(4) 104.08(7), C(18)-Ge(1)-Si(1) 118.99(7), C(8)-Ge(1)-Si(1) 72.78(7), Si(4)-Ge(1)-Si(1) 126.80(3), C(7)-Si(1)-Ge(1) 75.44(8), C(7)-C(8)-Ge(1) 103.27(16), C(25)-C(18)-Ge(1) 128.29(18), C(18)-C(25)-Si(5) 141.77(19).

## References

1. A. B. Pangborn, M. A. Giardello, R. H. Grubbs, R. K. Rosen, and F. J. Timmers, *Organometallics*, 1996, 15, 1518–1520.
2. C. Marschner, *Eur. J. Inorg. Chem.*, 1998, 221–226.
3. C. Kayser, R. Fischer, J. Baumgartner, and C. Marschner, *Organometallics*, 2002, 21, 1023–1030.
4. W. J. Leigh, C. R. Harrington, and I. Vargas-Baca, *J. Am. Chem. Soc.*, 2004, 126, 16105–16116.
5. N. Kuhn and T. Kratz, *Synthesis*, 1993, 561–562.
6. G. A. Morris and R. Freeman, *J. Am. Chem. Soc.*, 1979, 101, 760–762.
7. B. J. Helmer and R. West, *Organometallics*, 1982, 1, 877–879.
8. SAINTPLUS: Software Reference Manual, Version 6.45, Bruker-AXS, Madison, WI, 1997-2003.
9. Sheldrick, G. M. (2003). SADABS. Version 2.10. Bruker AXS Inc., Madison, USA.
10. R. H. Blessing, *Acta Cryst. A*, 1995, 51, 33–38.
11. G. M. Sheldrick, *Acta Cryst. A*, 2007, 64, 112–122.
